# Supplementary material for: Edible cellulose-based colorimetric timer
Source: Royal Society of Chemistry journal article supplement (doi:10.1039/d3nh00006k), 2023-01-01
Supplement: d3nh00006k1.pdf [file d3nh00006k1.pdf]

## Supporting Information

### Edible cellulose-based colorimetric timer†

Gen Kamita<sup>a</sup>, Silvia Vignolini<sup>\*a</sup>, and Ahu Gümrah Dumanli<sup>\*a,b,c</sup>

- a. Department of Chemistry, University of Cambridge, Lensfield Road, Cambridge CB2 1EW UK
- b. The School of Materials, The University of Manchester, Oxford Road, Manchester M13 9PL UK
- c. Henry Royce Institute, The University of Manchester, Oxford Rd, Manchester, M13 9PL, UK

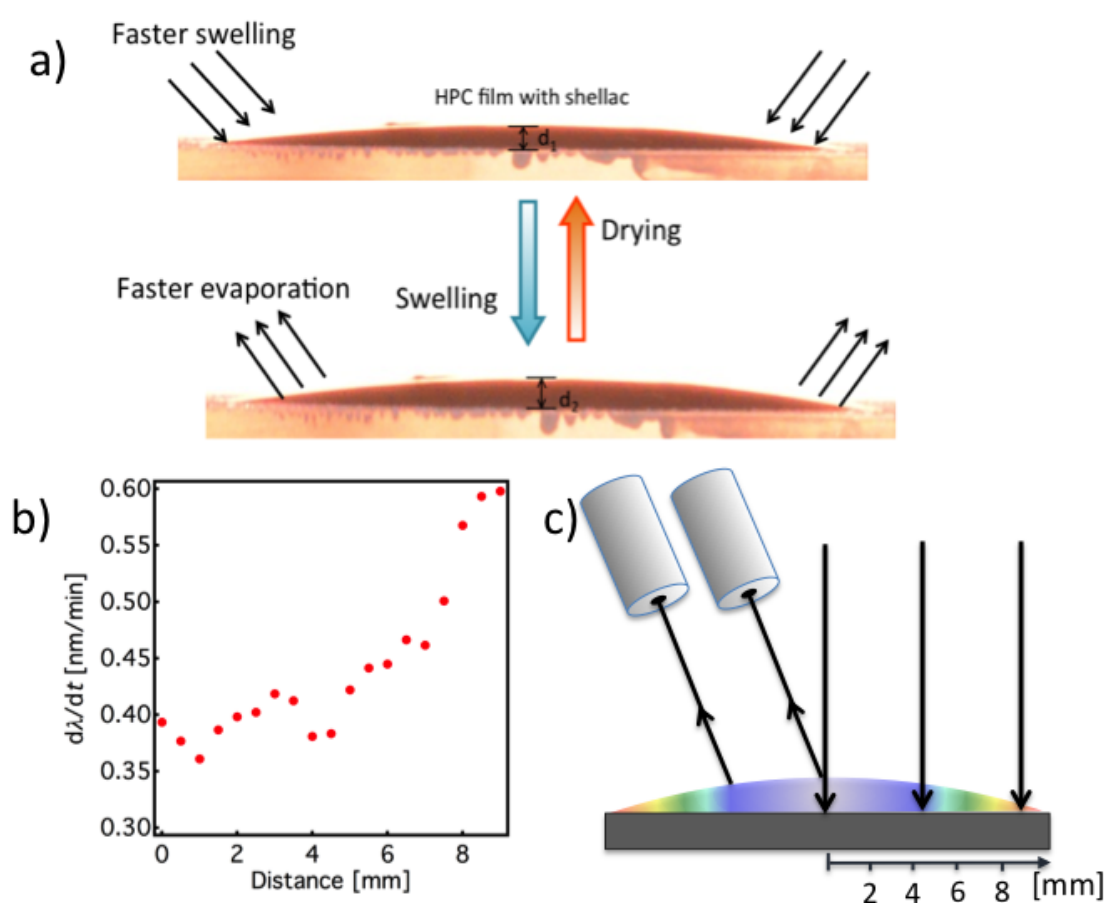

**Figure S1.** a) Photographic image of the side view of the HPC with shellac timer and the changes in the thickness as a function of water evaporation and swelling b) The colour shift of the timer device as a function of distance from the centre of the device construct in mm. c) Schematic representation of the colour shift experiment presented in (b)

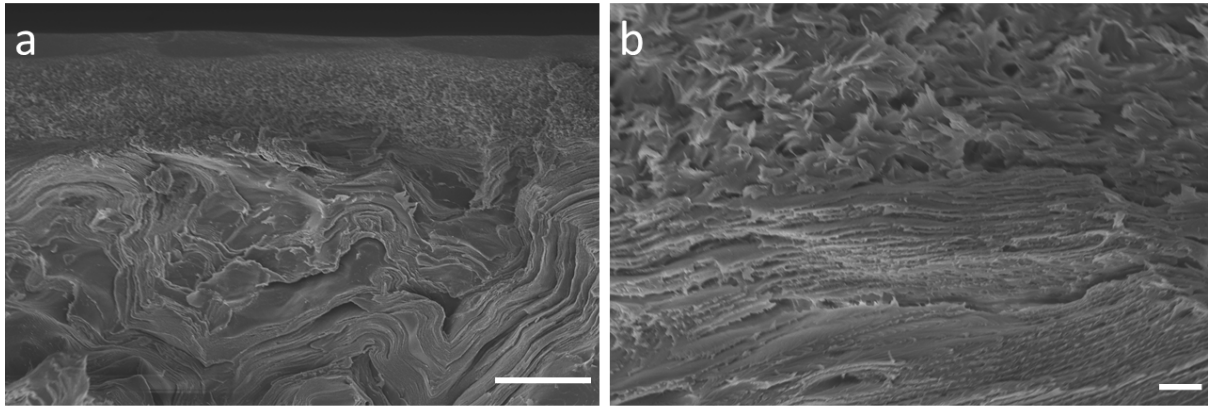

**Figure S2.** Scanning electron micrographs of the HPC-Shellac timer device in cross-sectional configuration in dry state demonstrating the cholesteric phase of the HPC and the semi-permeable network of the shellac demonstrating no order that can interfere with the light reflection from the HPC cholesteric phase. The scale bars are **a)** 5  $\mu\text{m}$  and **b)** 1  $\mu\text{m}$
